# Supplementary material
Source: Springer Nature journal article supplement (https://www.springermedizin.de/resource/supplementary/13049_2011_291_MOESM1_ESM.pdf/9666278)

**ABQ**

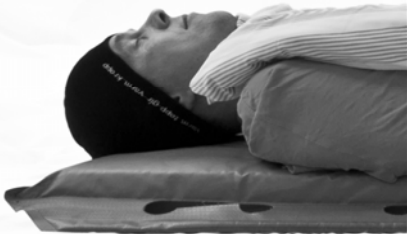

**BW**

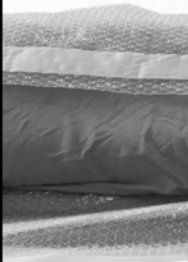

**HM**

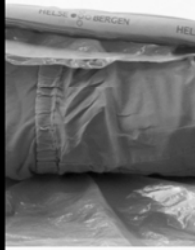

Supplement: MOESM1 [file 9666278]
